# Supplementary material for: Metabolomic approach for a rapid identification of natural products with cytotoxic activity against human colorectal cancer cells
Source: PubMed Central journal article supplement (PMC5871890; doi:10.1038/s41598-018-23704-9), 2018-03-28
Supplement: 41598_2018_23704_MOESM1_ESM.pdf [file 41598_2018_23704_MOESM1_ESM.pdf]

**Metabolomic approach for a rapid identification of natural products with cytotoxic activity  
against human colorectal cancer cells**

Vittoria Graziani<sup>1,§</sup>, Monica Scognamiglio<sup>1,2,§</sup>, Valentina Belli<sup>3</sup>, Assunta Esposito<sup>1</sup>, Brigida D'Abrosca<sup>1</sup>, Angela Chambery<sup>1</sup>, Rosita Russo<sup>1</sup>, Marta Panella<sup>1</sup>, Aniello Russo<sup>1</sup>, Fortunato Ciardiello<sup>3</sup>, Teresa Troiani<sup>3,\*</sup>, Nicoletta Potenza<sup>1,\*</sup>, Antonio Fiorentino<sup>1,\*</sup>

<sup>1</sup>Dipartimento di Scienze e Tecnologie Ambientali Biologiche e Farmaceutiche (DiSTABiF), Università degli Studi della Campania "Luigi Vanvitelli", via Vivaldi 43 I-81100, Caserta, Italy

<sup>2</sup>Max Planck Institute for Chemical Ecology - Beutenberg Campus, Hans-Knöll-Straße 8 D-07745 Jena, Germany

<sup>3</sup>Dipartimento Medico-Chirurgico di Internistica Clinica e Sperimentale "F. Magrassi - A. Lanzara", Università degli Studi della Campania "Luigi Vanvitelli" I-80131 Via Pansini, 5 - Napoli, Italy

**SUPPLEMENTARY INFORMATION**

**Table S1** Main metabolites detected in the studied plant extracts. <sup>1</sup>H-NMR data are measured in ppm and coupling constants (J) in Hertz.

| Plant Species                 | Metabolites                         | Chemical shift values                                                                                                                                               |
|-------------------------------|-------------------------------------|---------------------------------------------------------------------------------------------------------------------------------------------------------------------|
| <i>Astragalus boeticus</i>    | Cycloartanes                        | 0.37 (H19, d, J=4.6); 0.57 (H19, d, J=4.6); 0.99 (H30, s); 1.01 (H28, s); 1.06 (H29, s); 1.24 (H18, s); 1.24 (H26, s); 1.26 (H21, s); 1.34 (H27, s)                 |
|                               | Kaempferol                          | 6.32 (H6, d, J = 2.1); 6.53 (H8, d, J = 2.1); 7.00 (H2'/H6', d, J = 8.4); 8.03 (H3'/H5', d, J = 8.4)                                                                |
|                               | Quercetin                           | 6.27 (H6, d, J = 2.1); 6.52 (H8, d, J = 2.1); 6.99 (H5', d J = 8.5); 7.60 (H6', dd, J = 8.5, 2.1); 7.65 (H2', d J = 2.1)                                            |
| <i>Lathyrus cicera</i>        | Kaempferol derivative 1             | 6.52 (H6, d, J = 2.1); 6.78 (H8, d, J = 2.1); 7.06 (H2'/H6', d, J = 8.4); 8.02 (H3'/H5', d, J = 8.4)                                                                |
|                               | L-homoarginine                      | 1.63 (H6, m); 1.87 (H4, m); 3.20 (H7, t)                                                                                                                            |
|                               | γ-pyrone                            | 6.69 (d, J=5.1); 8.17 (d, J=5.1)                                                                                                                                    |
| <i>Lathyrus clymenum</i>      | Kaempferol                          | see <i>A. boeticus</i>                                                                                                                                              |
|                               | Catechin                            | 2.52 (H4b, dd); 2.82 (H4a, dd); 5.95 (H6, d, J = 2.1 Hz); 6.03 (H8, d, J = 2.1); 6.94–6.96 (ring B, ov)                                                             |
| <i>Medicago minima</i>        | Daidzein                            | 6.96 (H3'/H5', d J = 9.0); 6.97 (H8, d J = 2.0); 7.04 (H6, dd J = 9.0, 2.0); 7.43 (H2'/H6', d J = 9.0); 8.06 (H5, d J = 9.0); 8.21 (H2, s)                          |
|                               | Daidzin                             | 5.24 (H1'', d, J = 7.8); 6.96 (H3'/H5', d J = 9.0); 7.28 (H8, d J = 2.0); 7.25 (H6, dd J = 9.0, 2.0); 7.41 (H2'/H6', d J = 9.0); 8.17 (H5, d J = 9.0); 8.29 (H2, s) |
|                               | Genistein                           | 6.31 (H6, d J = 2.0), 6.47 (H8, d J = 2.0), 7.05 (H3'/H5', d J = 9.0); 7.44 (H2'/H6', d J = 9.0); 8.21 (H2, s)                                                      |
|                               | Phenylpropanoid                     | 6.42 (H8, d, J = 15.9) 7.60 (H7, d, J = 15.9)                                                                                                                       |
|                               | Quercetin-7-O glucoside             | 5.23 (H1'', d, J = 7.8); 6.54 (H6, d, J = 2.1); 6.90 (H8, d, J = 2.1); 7.06 (H5', d, J = 8.4); 7.66 (H6', dd, J = 8.7, 2.1); 7.83 (H2', d, J = 2.1)                 |
|                               | Trigonelline                        | 9.15 (H1, s); 8.86 (H3/H5, t)                                                                                                                                       |
| <i>Melilotus neapolitanus</i> | Coumarin                            | 6.51 (H3, d J = 9.6); 8.08 (H4, d J = 9.6); 6.89 (H6/H8, m); 7.40 (H5/H7, m)                                                                                        |
|                               | cis-Melilotoside                    | 5.03 (H10, d J = 7.8); 6.06 (H3, d J = 12.6); 6.86 (H4, d J = 12.6)                                                                                                 |
|                               | trans-Melilotoside                  | 5.01 (H10, d J = 7.5); 6.84(H3, d J = 16.2); 7.86 (H4, d J = 16.2);                                                                                                 |
|                               | Trigonelline                        | see <i>M. minima</i>                                                                                                                                                |
| <i>Ononis variegata</i>       | Caffeic acid derivative 1           | 6.47 (H-8', d, J = 15.9 Hz); 6.88 (H-5', d, J = 8.2 Hz); 7.09 (H6', dd, J=8.4, 2); 7.18 (H2', d, J=2.1); 7.67 (H7, d, J=15.9)                                       |
|                               | Quercetin derivative 1              | 6.32 (H6, d, J = 2.1); 6.53 (H8, d, J = 2.1); 6.95 (H5', d J = 8.5); 7.55 (H6', d J = 8.5, 2.1); 7.66 (H2', d J = 2.1)                                              |
| <i>Pisum sativum</i>          | Flavonoids                          | 6.31 (ring A, d, J = 2.1); 6.52 (ring A, d, J = 2.1)                                                                                                                |
| <i>Trifolium campestre</i>    | C6-glycosilated apigenin derivative | 6.72 (H8, S); 6.91(H8, S); 7.10 (H3'/H5',d, J = 9.0 Hz); 7.93 (H2'/H6',d, J = 9.0 Hz)                                                                               |
|                               | Trigonelline                        | see <i>M. minima</i>                                                                                                                                                |
| <i>Trifolium cherleri</i>     | Caffeic acid derivative 2           | 7.61 (H7, d, J=15.9); 7.18 (H2', d, J=2.1); 7.07 (H6', dd, J=8.4, 2); 6.87 (H-5', d, J = 8.2 Hz); δ 6.39 (H-8', d, J = 15.9 Hz)                                     |
|                               | Kaempferol derivative 2             | 6.32 (H6, d, J = 2.1); 6.53 (H8, d, J = 2.1); 6.95 (H2'/H6', d, J = 8.4); 8.17 (H3'/H5', d, J = 8.4)                                                                |
|                               | Quercetin derivative 2              | 6.27 (H6, d, J = 2.1); 6.52 (H8, d, J = 2.1); 6.95 (H5', d J = 8.5); 7.55 (H6', dd, J = 8.5, 2.1); 7.61 (H2', d J = 2.1)                                            |

|                             |                           |                                                                                                                                                                              |
|-----------------------------|---------------------------|------------------------------------------------------------------------------------------------------------------------------------------------------------------------------|
|                             | Trigonelline              | see <i>M. minima</i>                                                                                                                                                         |
| <i>Trifolium scabrum</i>    | Daidzein                  | see <i>M. minima</i>                                                                                                                                                         |
|                             | Daidzin                   | see <i>M. minima</i>                                                                                                                                                         |
|                             | Genistein                 | see <i>M. minima</i>                                                                                                                                                         |
|                             | Quercetin derivative 3    | 6.27(H6, d, J = 2.1); 6.46 (H8, d, J = 2.1); 6.92 (H5', d J = 8.5); 7.52 (H6', d J = 8.5, 2.1); 7.58 (H2', d J = 2.1)                                                        |
|                             | Kaempferol derivative 3   | 6.28 (H6, d J = 2.1), 6.48 (H8, d J = 2.1), 6.93 (H3'/H5', d J = 8.5); 7.96 (H3'/H5', d, J = 8.5)                                                                            |
| <i>Trigonella esculenta</i> | Caffeic acid derivative 3 | 7.59 (H7, d, J=15.9); 7.15 (H2', d, J=2.1); 7.06 (H6', dd, J=8.4, 2); 6.86 (H-5', d, J = 8.2 Hz); $\delta$ 6.38 (H-8', d, J = 15.9 Hz)                                       |
|                             | 4-hydroxyisoleucine       | 0.98 (H6, d, J=6.8); 1.25 (H5, d, J=6.3)                                                                                                                                     |
|                             | Quercetin derivative 4    | 6.27 (H6, d, J = 2.1); 6.53 (H8, d, J = 2.1); 6.97 (H5', d J = 8.5); 7.67 (H6', dd, J = 8.5, 2.1); 7.75 (H2', d J = 2.1)                                                     |
|                             | Trigonelline              | see <i>M. minima</i>                                                                                                                                                         |
| <i>Vicia bithynica</i>      | Chlorogenic acid          | 6.37 (H8', d, J=15.9); 7.61 (H7', d, J=15.9); 7.14 (H5', d, J = 2.0 Hz); 7.06 (H6', d, J = 8.5; 2.2 Hz) 6.88 (d, J = 8.2); 1.84 - 2.20 (H2/H6, m); 5.45 (ring A, ov)         |
|                             | Quercetin                 | See <i>A. boeticus</i>                                                                                                                                                       |
|                             | Quercetrin                | 0.91 (H6'', d, J = 6.0); 5.27 (H1'', d, J = 1.8); 6.31 (H6, d, J = 2.1); 6.51 (H8, d, J = 2.1); 6.98 (H5', d, J = 8.4); 7.34 (H6', dd, J = 8.7, 2.1); 7.37 (H2', d, J = 2.1) |
| <i>Vicia pseudocracca</i>   | Quercetrin                | see <i>V. bithynica</i>                                                                                                                                                      |
|                             | Trigonelline              | see <i>M. minima</i>                                                                                                                                                         |
| <i>Vicia angustifolia</i>   | Chlorogenic acid          | see <i>V. bithynica</i>                                                                                                                                                      |
|                             | Quercetin derivative 5    | 6.31 (H6, d, J = 2.1); 6.56 (H8, d, J = 2.1); 7.00 (H5', d J = 8.5); 7.64 (H6', dd, J = 8.5, 2.1); 7.67 (H2', d J = 2.1)                                                     |
